# Supplementary material for: A Mechanistic, Multiscale Mathematical Model of Immunogenicity for Therapeutic Proteins: Part 1—Theoretical Model
Source: PubMed Central journal article supplement — CPT Pharmacometrics Syst Pharmacol. 2014 Sep 3;3(9):e133–. doi: 10.1038/psp.2014.30 (PMC4211265; doi:10.1038/psp.2014.30), 2014-09-03
Supplement: psp201430x2.pdf [file psp201430x2.pdf]

**Table S1: State variables**

| Category          | State variable       | Definition                                                      | Unit                                               |
|-------------------|----------------------|-----------------------------------------------------------------|----------------------------------------------------|
| Maturation signal | $MS$                 | amount of maturation signal (e.g., lipopolysaccharide) received | ng                                                 |
| Dendritic cells   | $ID$                 | number of immature dendritic cells                              | cell number                                        |
|                   | $MD$                 | number of mature dendritic cells                                | cell number                                        |
| T cells           | $NT_i$               | number of naïve helper T cells                                  | cell number                                        |
|                   | $AT N_i$             | number of activated helper T cells derived from naïve T cells   | cell number                                        |
|                   | $AT M_i$             | number of activated helper T cells derived from memory T cells  | cell number                                        |
|                   | $MT_i$               | number of memory helper T cells                                 | cell number                                        |
|                   | $FT_i$               | number of functional helper T cells                             | cell number                                        |
|                   | $NB_i$               | number of naïve B cells recognizing Ag                          | cell number                                        |
| B cells           | $AB N_i$             | number of activated B cells derived from naïve B cells          | cell number                                        |
|                   | $AB M_i$             | number of activated B cells derived from memory B cells         | cell number                                        |
|                   | $MB_i$               | number of memory B cells                                        | cell number                                        |
|                   | $SP_i$               | number of short-lived plasma cells                              | cell number                                        |
|                   | $LP_i$               | number of long-lived plasma cells                               | cell number                                        |
| ADA and Ag        | $A_i$                | amount of antibody in plasma                                    | pmole                                              |
|                   | $Ag_{IS}$            | amount of antigenic protein at the injection site               | pmole                                              |
|                   | $Ag$                 | amount of antigenic protein in plasma                           | pmole                                              |
|                   | $Ag_{ec}$            | amount of antigenic protein in the extra central compartment    | pmole                                              |
|                   | $Ag_{pt}$            | amount of antigenic protein in the peripheral tissues           | pmole                                              |
|                   | $Ag^E$               | amount of antigenic protein in endosome                         | pmole                                              |
|                   | $p_i^E$              | amount of T-epitope peptides j                                  | pmole                                              |
|                   | $p_i M_k^E$          | amount of T-epitope-MHC-II complex in endosome                  | pmole                                              |
|                   | $p_i M_k$            | amount of T-epitope-MHC-II presented on DC membrane             | pmole                                              |
|                   | Antigen presentation | $cp^E$                                                          | amount of endogenous competing protein in endosome |
| $cpt^E$           |                      | amount of competing peptide in endosome                         | pmole                                              |
| $cpt M_k^E$       |                      | amount of competing peptide-MHC complex in endosomes            | pmole                                              |
| $cpt M_k$         |                      | amount of competing peptide-MHC complex on DC membrane          | pmole                                              |
| $M_k^E$           |                      | amount of MHC-II in endosome                                    | pmole                                              |
| $M_k$             |                      | amount of MHC-II on DC membrane                                 | pmole                                              |

\* The units for the cells in the system are in the unit of cell number, and the antibody, antigenic protein, and the MHC-II proteins are in the unit of pmole.
